# Supplementary material for: Scalable synthesis of carbon stabilized SiO/graphite sheets composite as anode for high-performance Li ion batteries
Source: Royal Society of Chemistry journal article supplement (doi:10.1039/c7ra05829b), 2017-01-01
Supplement: c7ra05829b1.pdf [file c7ra05829b1.pdf]

## Supporting Information

### Scalable Synthesis of Carbon stabilized SiO/Graphite Sheets Composite as Anode for High-Performance Li ion Batteries

*Qianliang Zhang, Ning Lin\*, Tianjun Xu, Tieqiang Li, Kangze Shen, Ying Han, Jie Zhou, Yitai Qian*

Department of chemistry, university of science and technology of china, Hefei Anhui province, 230026, P. R. china. *Email: ningl@mail.ustc.edu.cn*

#### Structural characterization

The morphology and structure of these samples in this work were characterized by X-Ray diffraction (Philips X'Pert Super diffractometer with Cu K $\alpha$  radiation ( $\lambda=1.54178\text{\AA}$ )), Raman spectrometer (Lab; RAM HR UV/VIS/NIR), scanning electron microscopy (SEM) (JSM; 6700F), and transmission electron microscopy (TEM) (JEOL; 2010).

#### Electrochemical measurement

Half-cell tests were conducted using two electrode coin-type cells (CR2016) with pure Li metal foil as counter and reference electrode. For preparing working electrode, a slurry mixture of as-prepared active materials, super P, and carboxymethylcellulose sodium (CMC-Na) at a weight ratio of 70: 15: 15, was coated on copper foil (99.9%). A solution of 1 M LiPF<sub>6</sub> in ethylene carbonate (EC) and diethyl carbonate (DEC) (1:1 in volume ratio) was served as electrolyte. The cells were assembled in an argon-filled glove box. It is noted that we adopted a copper foil with diameter size of 12 mm, the pasted mass on each electrode was 1.5 mg approximately. Galvanostatic charge/discharge measurements were carried out on a LAND-CT2001A instrument with a fixed voltage range of 0.01–1.5 V (vs. Li/Li<sup>+</sup>). Noted, the charge/discharge rate and specific capacity were calculated based on the total mass of active materials.

Cyclic voltammetry (CV) was performed on electrochemical workstation (CHI660D), with a scanning rate of  $0.1 \text{ mV s}^{-1}$  at room temperature. Electrochemical impedance spectroscopy (EIS) was also measured with an electrochemical workstation (CHI660D) by applying an alternating current (AC) voltage of 5 mV in the frequency range from 100 kHz to 0.2 Hz. Noted, the pre-set current density 1C value of SGC-1, SGC-3, SGC-5, SiO, SC, GC, and graphite are 900, 700, 550, 1800, 1500, 400, and 372  $\text{mA g}^{-1}$ , respectively. Noted that the reversible capacity and current density are calculated on basis of the weight of the composite.

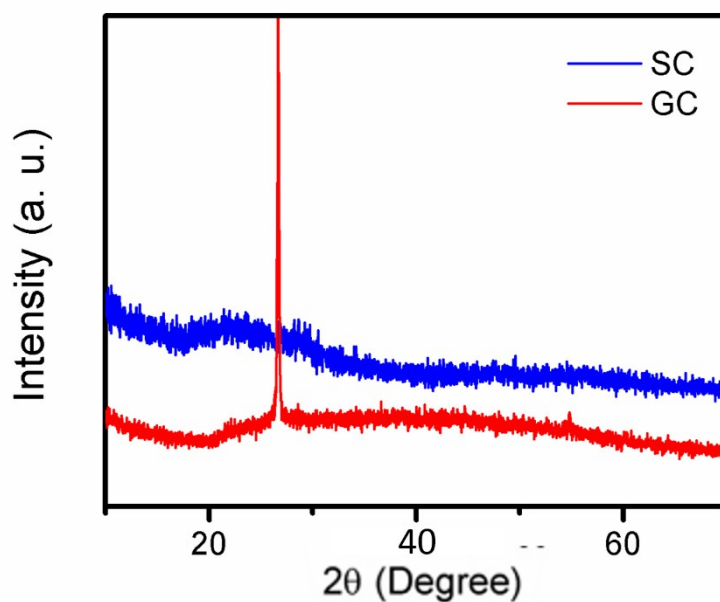

**Fig. S1** The XRD patterns of the SiO@C (SC) composite, and the graphite@C (GC) composites.

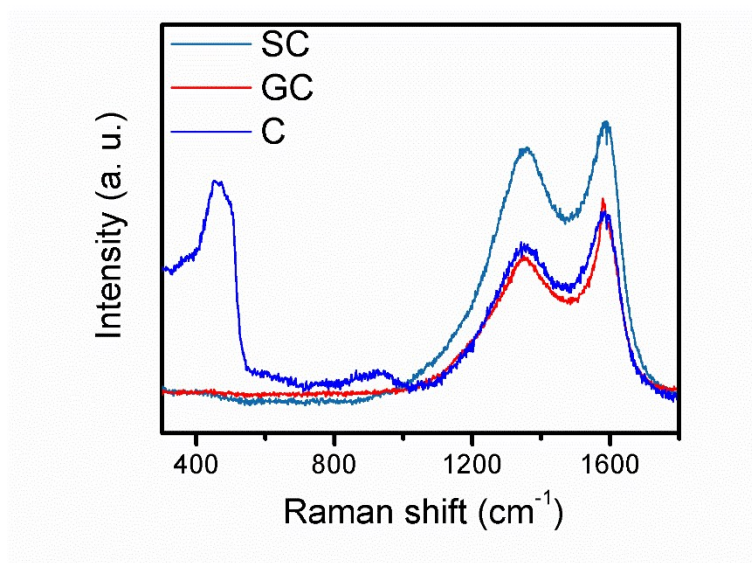

**Fig. S2** The Raman spectrum of the SC, GC, and carbon samples.

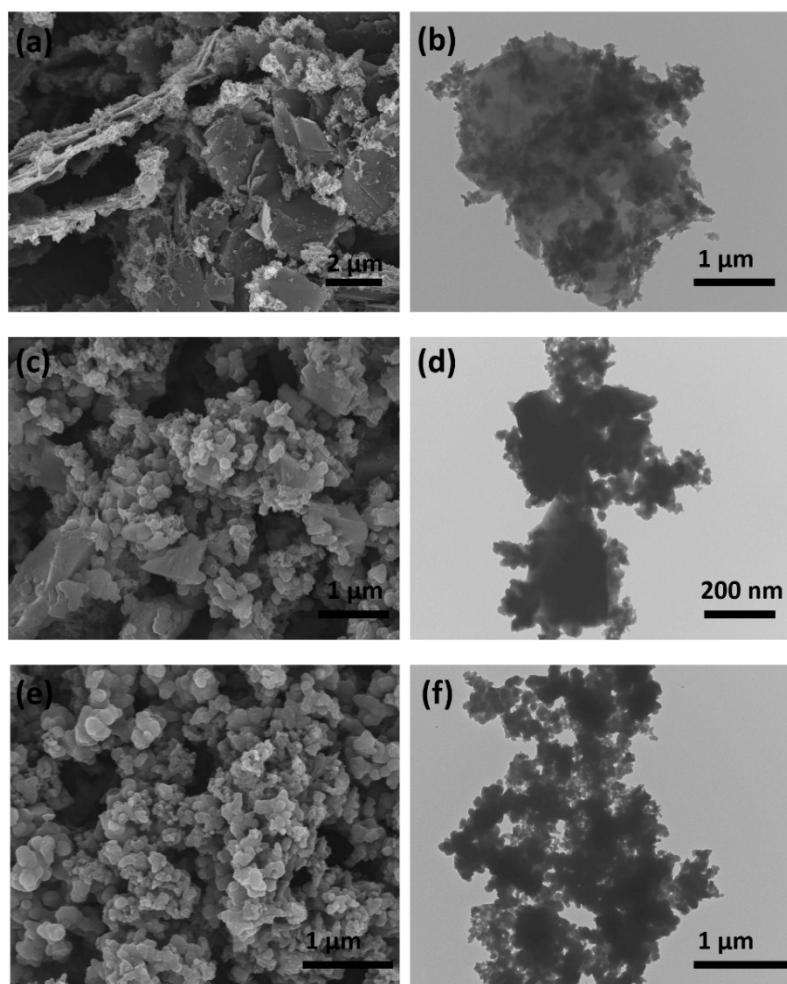

**Fig. S3** The SEM and TEM images of the (a, b) GC, (c,d) SC, and (e, f) polyaniline-derived carbon.

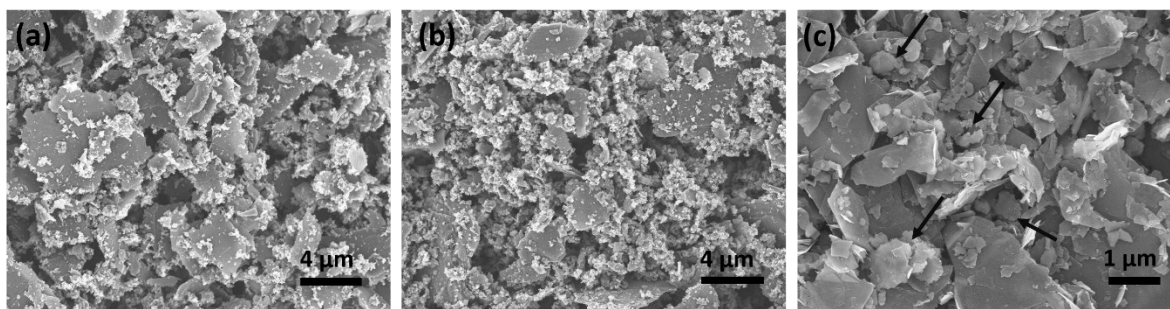

**Fig. S4** The SEM images of the SGC-1, SGC-3, and SG composite.

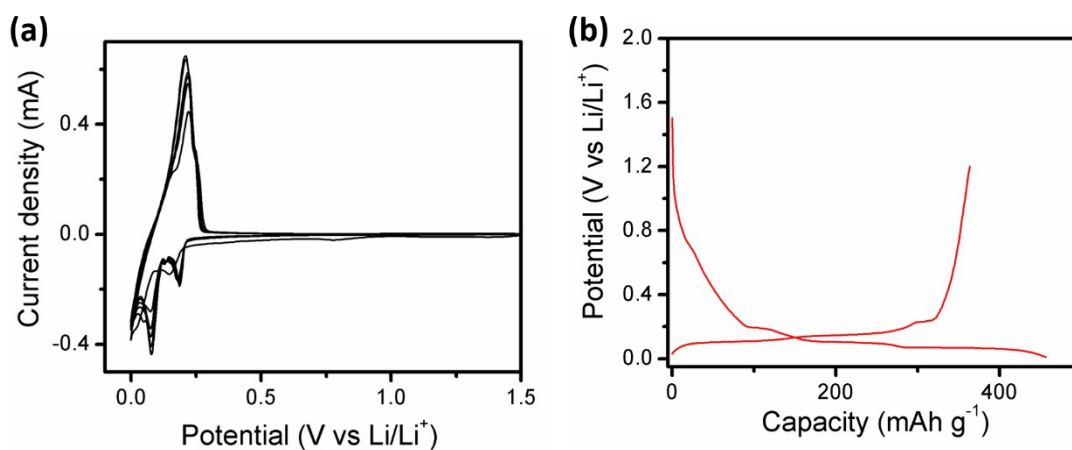

**Fig. S5** The (a) CV curves and (b) potential plateau of the graphite based electrode.

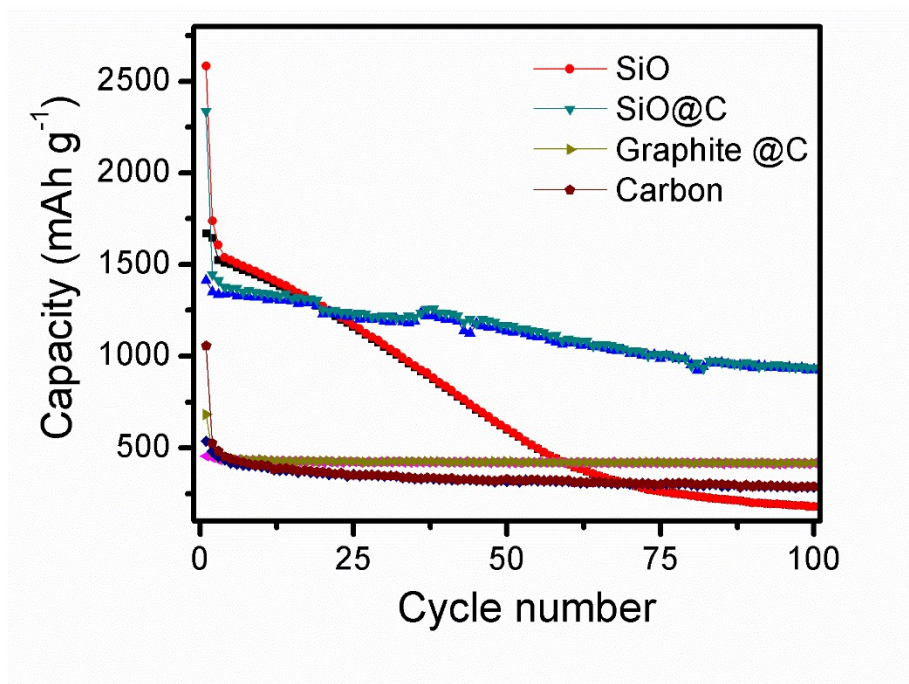

**Fig. S6** The cycling performance of the SiO, SC, GC, and carbon electrodes.



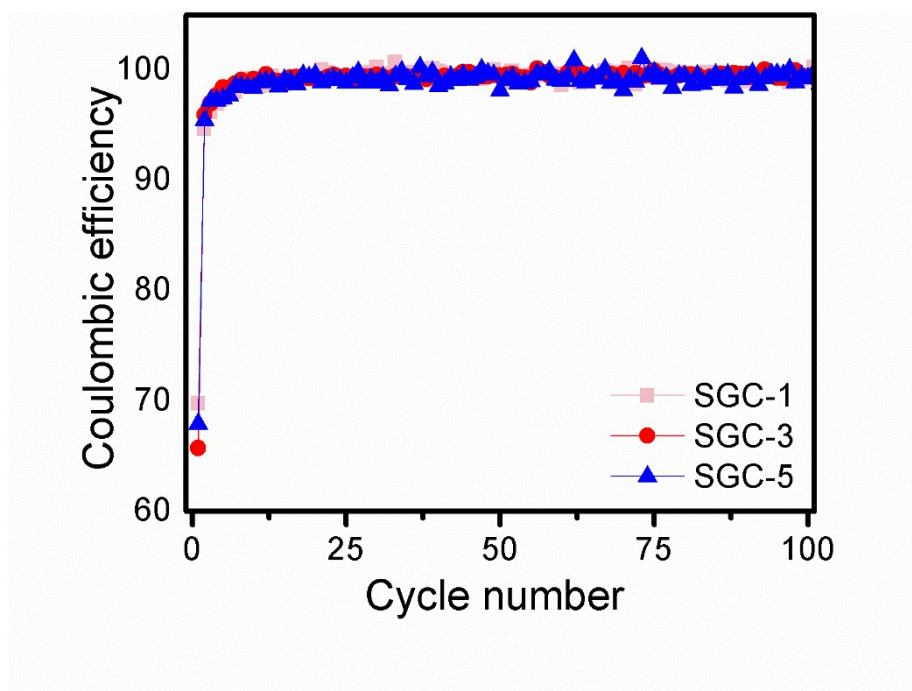

**Fig. S7** The coulombic efficiency of the SGCs electrodes at the current density of 0.2 C.

**Table S1.** The comparison of electrochemical performance between this work and previous similar report.

| Sample                     | Preparation method                                     | Initial discharge/charge capacity | Capacity retention after 100 cycles                               | Long-term cycling performance                                  | References                                     |
|----------------------------|--------------------------------------------------------|-----------------------------------|-------------------------------------------------------------------|----------------------------------------------------------------|------------------------------------------------|
| SiO/Graphite               | Direct blend                                           | 1394/1068 mAh/g                   | 500 mAh/g at 0.12 A/g, 72% capacity retention                     | none                                                           | J. Power Sources, 2008, 185, 542-548           |
| SiO@CNFs/G                 | Ball milling and spray-drying                          | 1030/550 mAh/g                    | 615.1 mAh/g at 0.1 A/g, with gradually improved capacity          | none                                                           | RSC Adv., 2014, 4, 34615-34622                 |
| SiO/G                      | ball milling                                           | 855/571 mAh/g                     | 390mAh/g only after 50 cycles at 0.23 A/g, 68% capacity retention | none                                                           | J Solid State Electrochem, 2012, 16, 1453-1460 |
| SiO/G/CNT                  | ball milling and chemical vapor deposition             | 790/513 mAh/g                     | 495mAh/g at 0.23 A/g, 96.5% capacity retention                    | none                                                           | J Solid State Electrochem, 2012, 16, 1453-1460 |
| Carbon coated SiO/Graphite | ball milling and chemical vapor deposition (full cell) | 523/840 mAh/g                     | 409 mAh/g at 0.2 A/g, 78.2% capacity retention                    | none                                                           | J. Electrochem. Soc., 2013, 160, A1348-A1352   |
| SGC-1                      | In situ polymerization and annealing                   | 1280/893 mAh/g                    | 774mAh/g at 0.18 A/g, 86.7% capacity retention                    | 592mAh/g at 0.72A/g, 77.4% capacity retention after 500 cycles | This work                                      |
| SGC-3                      |                                                        | 1072/734 mAh/g                    | 640mAh/g at 0.14 A/g, 87.2% capacity retention                    | 489mAh/g at 0.56A/g, 80% capacity retention after 500 cycles   | This work                                      |
| SGC-5                      |                                                        | 793/545 mAh/g                     | 508mAh/g at 0.11 A/g, 93.2% capacity retention                    | 432mAh/g at 0.44A/g, 84.8% capacity retention after 500 cycles | This work                                      |
